# Supplementary material for: Impaired Memory in OT-II Transgenic Mice Is Associated with Decreased Adult Hippocampal Neurogenesis Possibly Induced by Alteration in Th2 Cytokine Levels
Source: PubMed Central journal article supplement — Mol Cells. 2016 Jul 19;39(8):603–10. doi: 10.14348/molcells.2016.0072 (PMC4990752; doi:10.14348/molcells.2016.0072), 2016-07-19

**Supplementary figure 1.** OT-II mice expressed transgenic  $\alpha$ -, and  $\beta$ - chain. Genotyping was performed with polymer chain reaction using genomic DNA isolated from cut tail tissues and primer for mouse OT-II TCR  $\alpha$ -chain: forward: 5'-AAAGGGAGAAAAGCTCTCC-3', reverse: 5'-ACACAGCAGGTTCTGGGTTC-3'; mouse OT-II TCR  $\beta$ -chain: forward: 5'-GCTGCTGCACAGACCTACT-3', reverse: 5'-CAGCTCACCTAACACGAGGA-3'

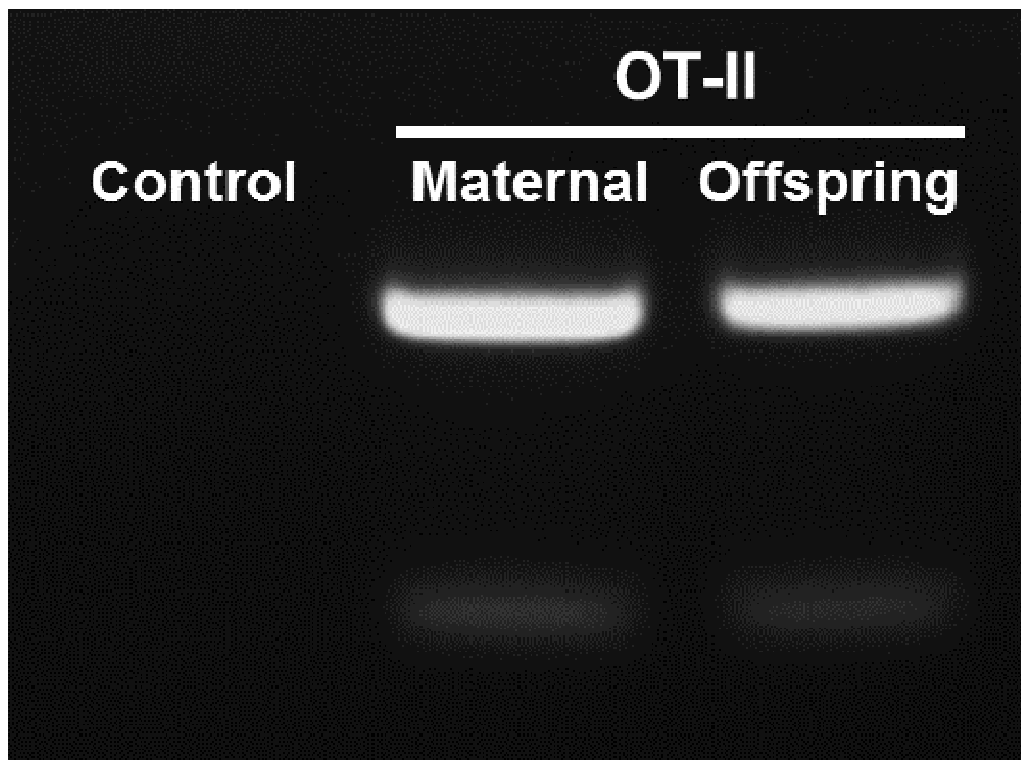

Supplement: molce-39-8-603-supple.pdf [file molce-39-8-603-supple.pdf]
